# Supplementary material for: A novel transcript of MEF2D promotes myoblast differentiation and its variations associated with growth traits in chicken
Source: PeerJ journal article supplement (doi:10.7717/peerj.8351), 2020-02-04

**MIEF2D**

**chr25:2,742,900-2,782,225**

□ **5'UTR**

■ **CDS**

■ **3'UTR**

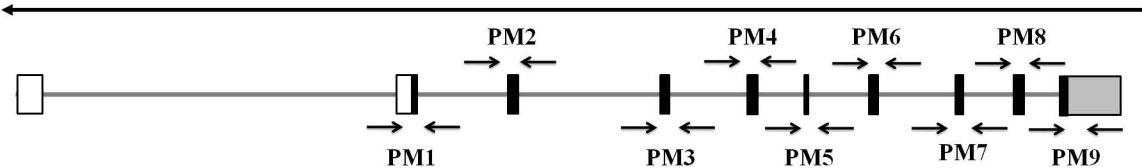

Supplement: Figrue_S1.pdf [file Figrue_S1.pdf]
