# Supplementary material for: A novel transcript of MEF2D promotes myoblast differentiation and its variations associated with growth traits in chicken
Source: PeerJ journal article supplement (doi:10.7717/peerj.8351), 2020-02-04

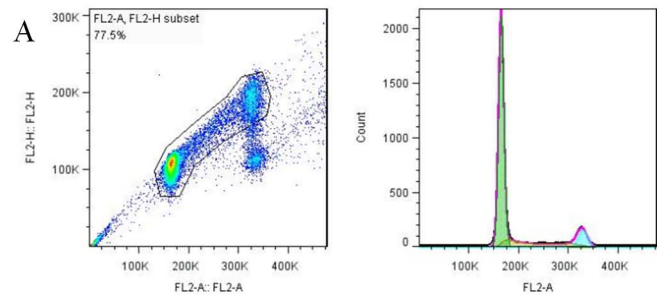

EGFP-Control

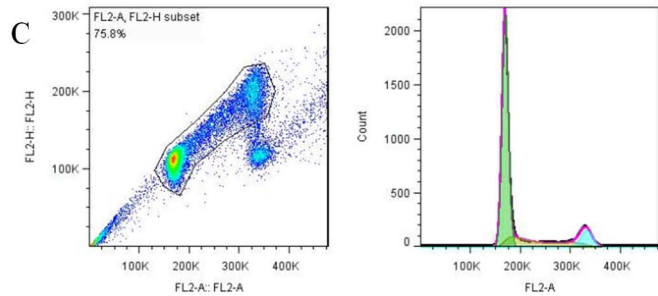

OV-RBFOX2

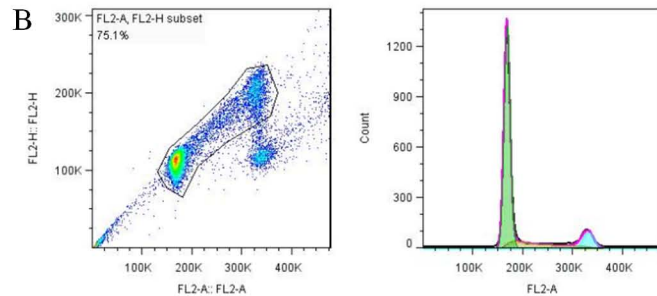

OV-MEF2D-V4

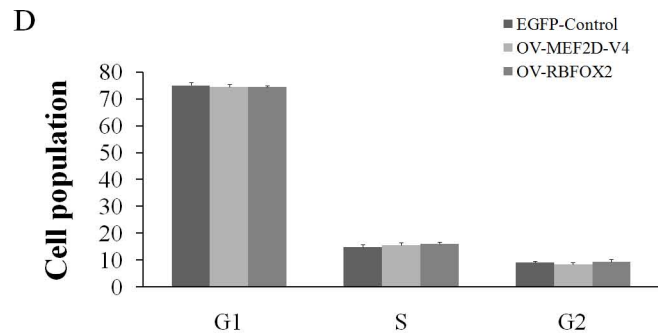

Supplement: Figrue_S3.pdf [file Figrue_S3.pdf]
