# Supplementary material for: A novel transcript of MEF2D promotes myoblast differentiation and its variations associated with growth traits in chicken
Source: PubMed Central journal article supplement (PMC7006513; doi:10.7717/peerj.8351), 2020-02-04
Supplement: peerj-08-8351-s004.pdf [file peerj-08-8351-s004.pdf]

| <br><input checked="" type="checkbox"/> Consensus<br>6 Sequences |        |    |     |                                  |     |    |         |                         |         |     |                                                   |                    |                   |  |
|------------------------------------------------------------------|--------|----|-----|----------------------------------|-----|----|---------|-------------------------|---------|-----|---------------------------------------------------|--------------------|-------------------|--|
|                                                                  | 10     | 20 | 30  | 40                               | 50  | 60 | 70      | 80                      | 90      | 100 | 110                                               | 120                | 130               |  |
| Chicken.pro                                                      | MGRKKI | QI | QRI | TDERNRQVTFTKRKFGLMKKAYELSVLCDCEI | ALI | I  | FNHSNKL | FQYASTDMDKVLLKYTEYNEPHE | SRTNADI | I   | ETLRKKGFNGCDSPEPDGDDSI                            | DQSPLMEDKYRKGSELDI | LFKRYGSA          |  |
| Human.pro                                                        | MGRKKI | QI | QRI | TDERNRQVTFTKRKFGLMKKAYELSVLCDCEI | ALI | I  | FNHSNKL | FQYASTDMDKVLLKYTEYNEPHE | SRTNADI | I   | ETLRKKGFNGCDSPEPDGEDSLEQSPLLEDKYRRASEELDGLFRRYGST |                    |                   |  |
| Mouse.pro                                                        | MGRKKI | QI | QRI | TDERNRQVTFTKRKFGLMKKAYELSVLCDCEI | ALI | I  | FNHSNKL | FQYASTDMDKVLLKYTEYNEPHE | SRTNADI | I   | ETLRKKGFNGCDSPEPDGEDSLEQSPLLEDKYRRASEELDGLFRRYGSS |                    |                   |  |
| V-Human.pro                                                      | MGRKKI | QI | QRI | TDERNRQVTFTKRKFGLMKKAYELSVLCDCEI | ALI | I  | FNHSNKL | FQYASTDMDKVLLKYTEYNEPHE | SRTNADI | I   | EALHKKHRECESPEVDEVFALT                            | PQTEEKYKKI         | DEEFDKMMQSYRLASTV |  |
| V-Mouse.pro                                                      | MGRKKI | QI | QRI | TDERNRQVTFTKRKFGLMKKAYELSVLCDCEI | ALI | I  | FNHSNKL | FQYASTDMDKVLLKYTEYNEPHE | SRTNADI | I   | EALHKKHRECESPEVDEAFALT                            | PQTEEKYKKI         | DEEFDKMMQSYRLASSV |  |
| V4-Chicken.pro                                                   | MGRKKI | QI | QRI | TDERNRQVTFTKRKFGLMKKAYELSVLCDCEI | ALI | I  | FNHSNKL | FQYASTDMDKVLLKYTEYNEPHE | SRTNADI | I   | EALNKKHRECESPEGDEVFALT                            | PQTEEKYKKI         | DEEFDKMMQSYRLASAV |  |

87-132 AA
